# Supplementary material
Source: PubMed Central journal article supplement (PMC6583035)

## Supplementary Online Content

Khan SQ, Berrington de Gonzalez A, Best AF, et al. Infant and youth mortality trends by race/ethnicity and cause of death in the United States. *JAMA Pediatr*. Published online October 1, 2018. doi:10.1001/jamapediatrics.2018.3317

**eTable 1.** ICD-10 Codes for Specific Causes of Death

**eTable 2.** Average Annual Percent Changes in mortality rates for the U.S., Canada and England/Wales, 1999-2015

**eTable 3.** Average annual percent change for all-cause mortality by age and race/ethnicity in the U.S.

**eTable 4.** Absolute Change in All-Cause Mortality between 1999-2002 & 2012-2015

**eTable 5.** Absolute Change for Leading Causes of Infant Mortality between 1999-2002 & 2012-2015

**eTable 6.** Absolute Change for Specific Causes of Unintentional Injury Mortality in Infants between 1999-2002 and 2012-2015

**eTable 7.** Absolute Change for Leading Causes of Youth Mortality between 1999-2002 & 2012-2015

**eTable 8.** Absolute Change for Specific Causes of Unintentional Injury Deaths in 20-24-year-olds between 1999-2002 and 2012-2015

**eTable 9.** Absolute Change for Means of Suicide between 1999-2002 and 2012-2015

**eFigure 1.** Non-Leading Causes of Death for White, Black and Latino Infants

**eFigure 2.** Absolute rate change between 1999-2002 and 2012-2015 for leading causes of death for White, Black and Latino A) 1-9-year-olds and B) 10-14-year-olds, and C) 15-19-year-olds. All rates are expressed per 100,000

This supplementary material has been provided by the authors to give readers additional information about their work.

**eTable 1.** ICD-10 Codes for Specific Causes of Death

| <b>Cause of Death</b>                              | <b>ICD-10 Code</b>                                                                                                                                     |
|----------------------------------------------------|--------------------------------------------------------------------------------------------------------------------------------------------------------|
| <b>Unintentional Injury Deaths (20-24-years)</b>   |                                                                                                                                                        |
| Motor Vehicle Injury Deaths                        | V02-V04, V09.0, V09.2, V12-V14,V19.0-V19.2, V19.4-V19.6, V20-V79,V80.3-V80.5, V81.0-V81.1, V82.0-V82.1, V83-V86, V87.0-V87.8, V88.0-V88.8, V89.0,V89.2 |
| Other Transport Injury Deaths                      | V01,V05-V06,V09.1,V09.3,V09.9-V11,V15-V18,V19.3,V19.8-V19.9,V80.0,V80.2,V80.6-V80.9,V81.2,V81.9,V82.2-V82.9,V87.9,V88.9,V89.1,V89.3,V89.9-V99,Y85      |
| Non-Transport Injury Deaths                        | W00-X39, X45-X59, Y86                                                                                                                                  |
| Unintentional Drug Poisonings                      | X40-X44                                                                                                                                                |
| <b>Unintentional Injury Deaths (&lt;1 years)</b>   |                                                                                                                                                        |
| Transport Injury Deaths                            | V01-V99                                                                                                                                                |
| Unintentional Suffocation and Strangulation in Bed | W75                                                                                                                                                    |
| All Other Unintentional Injury Deaths              | W00-W74, W76-X59                                                                                                                                       |
| <b>Suicide</b>                                     |                                                                                                                                                        |
| Drug Poisoning                                     | X60-X64                                                                                                                                                |
| Firearm                                            | X72-X74                                                                                                                                                |
| Hanging                                            | X70                                                                                                                                                    |
| Other                                              | X65-X68, X71, X75-X84                                                                                                                                  |

**eTable 2.** Average Annual Percent Changes in mortality rates for the U.S., Canada and England/Wales, 1999-2015

| Age group | USA AAPC | Lower CI | Upper CI | Canada AAPC | Lower CI | Upper CI | England/Wales AAPC | Lower CI | Upper CI |
|-----------|----------|----------|----------|-------------|----------|----------|--------------------|----------|----------|
| <1        | -1.46*   | -1.8     | -1.1     | -0.82*      | -1.1     | -0.5     | -2.57*             | -2.9     | -2.3     |
| 1-4       | -2.05*   | -2.3     | -1.8     | -2.00*      | -2.8     | -1.2     | -3.15*             | -3.7     | -2.6     |
| 5-9       | -2.48*   | -2.8     | -2.1     | -2.94*      | -3.7     | -2.2     | -2.43*             | -2.9     | -1.9     |
| 10-14     | -2.70*   | -3.1     | -2.3     | -2.31*      | -3.1     | -1.6     | -3.37*             | -4.0     | -2.7     |
| 15-19     | 2.89*    | -3.4     | -2.4     | -2.71*      | -3.0     | -2.4     | -4.01*             | -4.7     | -3.4     |
| 20-24     | -0.82*   | -1.3     | -0.3     | -1.54*      | -1.9     | -1.2     | -3.69*             | -4.2     | -3.2     |

\*p<0.05

**eTable 3.** Average annual percent change for all-cause mortality by age and race/ethnicity in the U.S.

| All-Cause Mortality    | Average Annual Percent Changes (1999-2015) | Lower CI | Upper CI |
|------------------------|--------------------------------------------|----------|----------|
| <b>&lt;1 year-olds</b> |                                            |          |          |
| AI/AN                  | 0.39                                       | -0.2     | 1.0      |
| API                    | -0.71*                                     | -1.2     | -0.3     |
| Black                  | -1.99*                                     | -2.4     | -1.5     |
| Latino                 | -1.53*                                     | -2.0     | -1.0     |
| White                  | -1.17*                                     | -1.5     | -0.9     |
| <b>1-9 year-olds</b>   |                                            |          |          |
| AI/AN                  | -0.17                                      | -0.8     | 0.5      |
| API                    | -2.62*                                     | -3.3     | -1.9     |
| Black                  | -2.08*                                     | -2.5     | -1.7     |
| Latino                 | -2.89*                                     | -3.4     | -2.4     |
| White                  | -1.92*                                     | -2.1     | -1.7     |
| <b>10-14 year-olds</b> |                                            |          |          |
| AI/AN                  | -1.42                                      | -3.3     | 0.5      |
| API                    | -3.33*                                     | -4.3     | -2.4     |
| Black                  | -2.58*                                     | -3.1     | -2.1     |
| Latino                 | -2.84*                                     | -3.4     | -2.3     |
| White                  | -2.48*                                     | -3.0     | -2.0     |
| <b>15-19 year-olds</b> |                                            |          |          |
| AI/AN                  | -1.93*                                     | -2.9     | -1.0     |
| API                    | -3.59*                                     | -4.7     | -2.5     |
| Black                  | -2.08*                                     | -2.6     | -1.6     |
| Latino                 | -3.81*                                     | -4.7     | -3.0     |
| White                  | -2.79*                                     | -3.3     | -2.3     |
| <b>20-24 year-olds</b> |                                            |          |          |
| AI/AN                  | 0.34                                       | -0.2     | 0.9      |
| API                    | -1.00*                                     | -1.7     | -0.3     |
| Black                  | -1.84*                                     | -2.2     | -1.4     |
| Latino                 | -1.89*                                     | -2.7     | -1.1     |
| White                  | -0.10                                      | -0.6     | 0.4      |

\*p<0.05

**eTable 4.** Absolute Change in All-Cause Mortality between 1999-2002 & 2012-2015

| Age, years | Race/<br>Ethnicity | Years     | Rate per<br>100,000 | Count | Population | Absolute<br>Change per<br>100,000 |
|------------|--------------------|-----------|---------------------|-------|------------|-----------------------------------|
| <1         | AI/AN              | 1999-2002 | 876.41              | 964   | 109,994    | 28.63                             |
| <1         | AI/AN              | 2012-2015 | 905.05              | 1031  | 113,917    |                                   |
| <1         | API                | 1999-2002 | 425.12              | 2870  | 675,108    | -37.31                            |
| <1         | API                | 2012-2015 | 387.81              | 3387  | 873,374    |                                   |
| <1         | Black              | 1999-2002 | 1437.50             | 33675 | 2,342,602  | -318.70                           |
| <1         | Black              | 2012-2015 | 1118.80             | 27151 | 2,426,787  |                                   |
| <1         | Latino             | 1999-2002 | 562.64              | 18633 | 3,311,730  | -92.28                            |
| <1         | Latino             | 2012-2015 | 470.36              | 19141 | 4,069,431  |                                   |
| <1         | White              | 1999-2002 | 589.64              | 53840 | 9,130,965  | -83.75                            |
| <1         | White              | 2012-2015 | 505.89              | 41782 | 8,259,071  |                                   |
| 1-9        | AI/AN              | 1999-2002 | 42.29               | 429   | 1,029,561  | 0.28                              |
| 1-9        | AI/AN              | 2012-2015 | 42.57               | 450   | 1,049,374  |                                   |
| 1-9        | API                | 1999-2002 | 16.53               | 980   | 5,875,274  | -4.59                             |
| 1-9        | API                | 2012-2015 | 11.94               | 978   | 8,174,976  |                                   |
| 1-9        | Black              | 1999-2002 | 35.36               | 7804  | 22,291,060 | -7.96                             |
| 1-9        | Black              | 2012-2015 | 27.40               | 6105  | 22,117,715 |                                   |
| 1-9        | Latino             | 1999-2002 | 20.72               | 5596  | 26,594,868 | -6.44                             |
| 1-9        | Latino             | 2012-2015 | 14.28               | 5340  | 37,052,666 |                                   |
| 1-9        | White              | 1999-2002 | 20.94               | 17994 | 86,303,322 | -4.60                             |
| 1-9        | White              | 2012-2015 | 16.35               | 12598 | 77,057,441 |                                   |
| 10-14      | AI/AN              | 1999-2002 | 33.81               | 219   | 647,714    | -7.87                             |
| 10-14      | AI/AN              | 2012-2015 | 25.94               | 149   | 574,314    |                                   |
| 10-14      | API                | 1999-2002 | 13.62               | 447   | 3,282,624  | -4.34                             |
| 10-14      | API                | 2012-2015 | 9.28                | 418   | 4,505,929  |                                   |
| 10-14      | Black              | 1999-2002 | 27.64               | 3597  | 13,016,250 | -7.73                             |
| 10-14      | Black              | 2012-2015 | 19.91               | 2466  | 12,386,871 |                                   |
| 10-14      | Latino             | 1999-2002 | 17.04               | 2249  | 13,196,911 | -4.91                             |
| 10-14      | Latino             | 2012-2015 | 12.13               | 2332  | 19,227,901 |                                   |
| 10-14      | White              | 1999-2002 | 18.62               | 9807  | 52,662,302 | -4.92                             |
| 10-14      | White              | 2012-2015 | 13.70               | 6254  | 45,644,006 |                                   |
| 15-19      | AI/AN              | 1999-2002 | 138.84              | 830   | 597,828    | -35.23                            |
| 15-19      | AI/AN              | 2012-2015 | 103.60              | 591   | 570,443    |                                   |
| 15-19      | API                | 1999-2002 | 37.07               | 1284  | 3,463,516  | -13.05                            |
| 15-19      | API                | 2012-2015 | 24.02               | 1094  | 4,554,372  |                                   |
| 15-19      | Black              | 1999-2002 | 88.83               | 10689 | 12,033,644 | -20.85                            |
| 15-19      | Black              | 2012-2015 | 67.98               | 8850  | 13,019,587 |                                   |
| 15-19      | Latino             | 1999-2002 | 61.18               | 7908  | 12,925,959 | -22.97                            |
| 15-19      | Latino             | 2012-2015 | 38.21               | 7061  | 18,478,195 |                                   |

| <b>Age, years</b> | <b>Race/<br/>Ethnicity</b> | <b>Years</b> | <b>Rate per<br/>100,000</b> | <b>Count</b> | <b>Pop</b> | <b>Absolute<br/>Change per<br/>100,000</b> |
|-------------------|----------------------------|--------------|-----------------------------|--------------|------------|--------------------------------------------|
| 15-19             | White                      | 1999-2002    | 64.51                       | 33633        | 52,136,864 | -19.44                                     |
| 15-19             | White                      | 2012-2015    | 45.07                       | 21538        | 47,787,191 |                                            |
| 20-24             | AI/AN                      | 1999-2002    | 192.90                      | 898          | 465,519    | 9.66                                       |
| 20-24             | AI/AN                      | 2012-2015    | 202.56                      | 1203         | 593,905    |                                            |
| 20-24             | API                        | 1999-2002    | 41.66                       | 1610         | 3,864,537  | -4.29                                      |
| 20-24             | API                        | 2012-2015    | 37.37                       | 2056         | 5,501,081  |                                            |
| 20-24             | Black                      | 1999-2002    | 157.38                      | 17145        | 10,893,725 | -33.17                                     |
| 20-24             | Black                      | 2012-2015    | 124.21                      | 17675        | 14,229,432 |                                            |
| 20-24             | Latino                     | 1999-2002    | 83.94                       | 11703        | 13,941,374 | -16.62                                     |
| 20-24             | Latino                     | 2012-2015    | 67.33                       | 12627        | 18,754,204 |                                            |
| 20-24             | White                      | 1999-2002    | 84.27                       | 40684        | 48,278,386 | 0.21                                       |
| 20-24             | White                      | 2012-2015    | 84.48                       | 43605        | 51,613,582 |                                            |

**eTable 5.** Absolute Change for Leading Causes of Infant Mortality between 1999-2002 & 2012-2015

| <b>SIDS</b>                        |              |                         |              |                   |                                    |
|------------------------------------|--------------|-------------------------|--------------|-------------------|------------------------------------|
| <b>Race</b>                        | <b>Years</b> | <b>Rate per 100,000</b> | <b>Count</b> | <b>Population</b> | <b>Absolute Change per 100,000</b> |
| Black                              | 1999-2002    | 130.45                  | 3,056        | 2,342,602         | -49.94                             |
| Black                              | 2012-2015    | 80.52                   | 1,954        | 2,426,787         |                                    |
| Latino                             | 1999-2002    | 35.00                   | 1,159        | 3,311,730         | -13.10                             |
| Latino                             | 2012-2015    | 21.90                   | 891          | 4,069,431         |                                    |
| White                              | 1999-2002    | 56.08                   | 5,121        | 9,130,965         | -17.30                             |
| White                              | 2012-2015    | 38.78                   | 3,203        | 8,259,071         |                                    |
| <b>Maternal Complications</b>      |              |                         |              |                   |                                    |
| Black                              | 1999-2002    | 88.53                   | 2,074        | 2,342,602         | -7.15                              |
| Black                              | 2012-2015    | 81.38                   | 1,975        | 2,426,787         |                                    |
| Latino                             | 1999-2002    | 23.37                   | 774          | 3,311,730         | 8.99                               |
| Latino                             | 2012-2015    | 32.36                   | 1,317        | 4,069,431         |                                    |
| White                              | 1999-2002    | 31.67                   | 2,892        | 9,130,965         | -1.45                              |
| White                              | 2012-2015    | 30.22                   | 2,496        | 8,259,071         |                                    |
| <b>Placental Complications</b>     |              |                         |              |                   |                                    |
| Black                              | 1999-2002    | 53.32                   | 1,249        | 2,342,602         | -6.38                              |
| Black                              | 2012-2015    | 46.93                   | 1,139        | 2,426,787         |                                    |
| Latino                             | 1999-2002    | 18.87                   | 625          | 3,311,730         | 0.39                               |
| Latino                             | 2012-2015    | 19.27                   | 784          | 4,069,431         |                                    |
| White                              | 1999-2002    | 22.75                   | 2,077        | 9,130,965         | -2.64                              |
| White                              | 2012-2015    | 20.11                   | 1,661        | 8,259,071         |                                    |
| <b>Short Gestation</b>             |              |                         |              |                   |                                    |
| Black                              | 1999-2002    | 309.61                  | 7,253        | 2,342,602         | -58.25                             |
| Black                              | 2012-2015    | 251.36                  | 6,100        | 2,426,787         |                                    |
| Latino                             | 1999-2002    | 81.83                   | 2,710        | 3,311,730         | -2.02                              |
| Latino                             | 2012-2015    | 79.82                   | 3,248        | 4,069,431         |                                    |
| White                              | 1999-2002    | 76.52                   | 6,987        | 9,130,965         | -0.78                              |
| White                              | 2012-2015    | 75.74                   | 6,255        | 8,259,071         |                                    |
| <b>Unintentional Injury Deaths</b> |              |                         |              |                   |                                    |
| Black                              | 1999-2002    | 47.60                   | 1,115        | 2,342,602         | 18.38                              |
| Black                              | 2012-2015    | 65.97                   | 1,601        | 2,426,787         |                                    |
| Latino                             | 1999-2002    | 16.09                   | 533          | 3,311,730         | 0.40                               |
| Latino                             | 2012-2015    | 16.49                   | 671          | 4,069,431         |                                    |
| White                              | 1999-2002    | 20.28                   | 1,852        | 9,130,965         | 7.60                               |
| White                              | 2012-2015    | 27.88                   | 2,303        | 8,259,071         |                                    |
| <b>Congenital Malformations</b>    |              |                         |              |                   |                                    |
| Black                              | 1999-2002    | 173.74                  | 4,070        | 2,342,602         | -25.31                             |
| Black                              | 2012-2015    | 148.43                  | 3,602        | 2,426,787         |                                    |
| Latino                             | 1999-2002    | 142.10                  | 4,706        | 3,311,730         | -21.84                             |
| Latino                             | 2012-2015    | 120.26                  | 4,894        | 4,069,431         |                                    |
| White                              | 1999-2002    | 136.32                  | 12,447       | 9,130,965         | -19.73                             |
| White                              | 2012-2015    | 116.59                  | 9,629        | 8,259,071         |                                    |

SIDS: sudden infant death syndrome

**eTable 6.** Absolute Change for Specific Causes of Unintentional Injury Mortality in Infants between 1999-2002 and 2012-2015

| Race/Ethnicity                                            | Years     | Rate per 100,000 | Count | Population | Absolute Change per 100,000 |
|-----------------------------------------------------------|-----------|------------------|-------|------------|-----------------------------|
| <b>Transport Injury Deaths</b>                            |           |                  |       |            |                             |
| Black                                                     | 1999-2002 | 5.89             | 138   | 2,342,602  | -3.30                       |
| Black                                                     | 2012-2015 | 2.60             | 63    | 2,426,787  |                             |
| Latino                                                    | 1999-2002 | 4.56             | 151   | 3,311,730  | -3.04                       |
| Latino                                                    | 2012-2015 | 1.52             | 62    | 4,069,431  |                             |
| White                                                     | 1999-2002 | 3.40             | 310   | 9,130,965  | -1.68                       |
| White                                                     | 2012-2015 | 1.72             | 142   | 8,259,071  |                             |
| <b>Unintentional Suffocation and Strangulation in Bed</b> |           |                  |       |            |                             |
| Black                                                     | 1999-2002 | 19.76            | 463   | 2,342,602  | 29.03                       |
| Black                                                     | 2012-2015 | 48.79            | 1,184 | 2,426,787  |                             |
| Latino                                                    | 1999-2002 | 4.29             | 142   | 3,311,730  | 6.11                        |
| Latino                                                    | 2012-2015 | 10.40            | 423   | 4,069,431  |                             |
| White                                                     | 1999-2002 | 7.52             | 687   | 9,130,965  | 11.63                       |
| White                                                     | 2012-2015 | 19.16            | 1,582 | 8,259,071  |                             |
| <b>Other Unintentional Injury Deaths</b>                  |           |                  |       |            |                             |
| Black                                                     | 1999-2002 | 21.94            | 514   | 2,342,602  | -8.18                       |
| Black                                                     | 2012-2015 | 13.76            | 334   | 2,426,787  |                             |
| Latino                                                    | 1999-2002 | 7.25             | 240   | 3,311,730  | -2.80                       |
| Latino                                                    | 2012-2015 | 4.45             | 181   | 4,069,431  |                             |
| White                                                     | 1999-2002 | 9.36             | 855   | 9,130,965  | -2.57                       |
| White                                                     | 2012-2015 | 6.79             | 561   | 8,259,071  |                             |



**eTable 7.** Absolute Change for Leading Causes of Youth Mortality between 1999-2002 & 2012-2015

| Unintentional Injury Deaths |        |           |                  |        |            |                             |
|-----------------------------|--------|-----------|------------------|--------|------------|-----------------------------|
| Age, years                  | Race   | Years     | Rate per 100,000 | Count  | Population | Absolute Change per 100,000 |
| 1-9                         | Black  | 1999-2002 | 12.80            | 2,838  | 22,291,060 | -4.66                       |
| 1-9                         | Black  | 2012-2015 | 8.15             | 1,813  | 22,117,715 |                             |
| 1-9                         | Latino | 1999-2002 | 7.63             | 2,058  | 26,594,868 | -3.26                       |
| 1-9                         | Latino | 2012-2015 | 4.37             | 1,634  | 37,052,666 |                             |
| 1-9                         | White  | 1999-2002 | 8.05             | 6,923  | 86,303,322 | -2.61                       |
| 1-9                         | White  | 2012-2015 | 5.44             | 4,192  | 77,057,441 |                             |
| 10-14                       | Black  | 1999-2002 | 9.40             | 1,224  | 13,016,250 | -4.30                       |
| 10-14                       | Black  | 2012-2015 | 5.10             | 632    | 12,386,871 |                             |
| 10-14                       | Latino | 1999-2002 | 5.71             | 753    | 13,196,911 | -2.59                       |
| 10-14                       | Latino | 2012-2015 | 3.12             | 599    | 19,227,901 |                             |
| 10-14                       | White  | 1999-2002 | 7.68             | 4,043  | 52,662,302 | -3.92                       |
| 10-14                       | White  | 2012-2015 | 3.76             | 1,717  | 45,644,006 |                             |
| 15-19                       | Black  | 1999-2002 | 24.81            | 2,985  | 12,033,644 | -9.07                       |
| 15-19                       | Black  | 2012-2015 | 15.74            | 2,049  | 13,019,587 |                             |
| 15-19                       | Latino | 1999-2002 | 27.44            | 3,547  | 12,925,959 | -12.56                      |
| 15-19                       | Latino | 2012-2015 | 14.88            | 2,749  | 18,478,195 |                             |
| 15-19                       | White  | 1999-2002 | 37.37            | 19,483 | 52,136,864 | -16.78                      |
| 15-19                       | White  | 2012-2015 | 20.59            | 9,837  | 47,787,191 |                             |
| 20-24                       | Black  | 1999-2002 | 34.55            | 3,764  | 10,893,725 | -7.76                       |
| 20-24                       | Black  | 2012-2015 | 26.79            | 3,812  | 14,229,432 |                             |
| 20-24                       | Latino | 1999-2002 | 36.50            | 5,089  | 13,941,374 | -7.82                       |
| 20-24                       | Latino | 2012-2015 | 28.68            | 5,379  | 18,754,204 |                             |
| 20-24                       | White  | 1999-2002 | 41.83            | 20,193 | 48,278,386 | 0.79                        |
| 20-24                       | White  | 2012-2015 | 42.62            | 21,996 | 51,613,582 |                             |
| Homicide                    |        |           |                  |        |            |                             |
| 1-9                         | Black  | 1999-2002 | 3.63             | 794    | 22,291,060 | -0.51                       |
| 1-9                         | Black  | 2012-2015 | 3.12             | 699    | 22,117,715 |                             |
| 1-9                         | Latino | 1999-2002 | 1.33             | 360    | 26,594,868 | -0.42                       |
| 1-9                         | Latino | 2012-2015 | 0.90             | 339    | 37,052,666 |                             |
| 1-9                         | White  | 1999-2002 | 1.07             | 917    | 86,303,322 | -0.03                       |
| 1-9                         | White  | 2012-2015 | 1.04             | 804    | 77,057,441 |                             |
| 10-14                       | Black  | 1999-2002 | 2.44             | 318    | 13,016,250 | -0.38                       |
| 10-14                       | Black  | 2012-2015 | 2.06             | 255    | 12,386,871 |                             |
| 10-14                       | Latino | 1999-2002 | 1.41             | 186    | 13,196,911 | -0.69                       |
| 10-14                       | Latino | 2012-2015 | 0.72             | 139    | 19,227,901 |                             |
| 10-14                       | White  | 1999-2002 | 0.66             | 349    | 52,662,302 | -0.18                       |
| 10-14                       | White  | 2012-2015 | 0.49             | 222    | 45,644,006 |                             |

| Age, years        | Race   | Years     | Rate per 100,000 | Count | Population | Absolute Change per 100,000 |
|-------------------|--------|-----------|------------------|-------|------------|-----------------------------|
| <b>Homicide</b>   |        |           |                  |       |            |                             |
| 15-19             | Black  | 1999-2002 | 34.49            | 4,150 | 12,033,644 | -5.13                       |
| 15-19             | Black  | 2012-2015 | 29.36            | 3,822 | 13,019,587 |                             |
| 15-19             | Latino | 1999-2002 | 14.61            | 1,888 | 12,925,959 | -7.50                       |
| 15-19             | Latino | 2012-2015 | 7.11             | 1,314 | 18,478,195 |                             |
| 15-19             | White  | 1999-2002 | 2.95             | 1,537 | 52,136,864 | -1.20                       |
| 15-19             | White  | 2012-2015 | 1.75             | 834   | 47,787,191 |                             |
| 20-24             | Black  | 1999-2002 | 65.77            | 7,165 | 10,893,725 | -12.90                      |
| 20-24             | Black  | 2012-2015 | 52.88            | 7,524 | 14,229,432 |                             |
| 20-24             | Latino | 1999-2002 | 20.48            | 2,855 | 13,941,374 | -8.43                       |
| 20-24             | Latino | 2012-2015 | 12.05            | 2,260 | 18,754,204 |                             |
| 20-24             | White  | 1999-2002 | 5.03             | 2,426 | 48,278,386 | -1.21                       |
| 20-24             | White  | 2012-2015 | 3.82             | 1,969 | 51,613,582 |                             |
| <b>Malignancy</b> |        |           |                  |       |            |                             |
| 1-9               | Black  | 1999-2002 | 2.44             | 544   | 22,291,060 | -0.23                       |
| 1-9               | Black  | 2012-2015 | 2.21             | 489   | 22,117,715 |                             |
| 1-9               | Latino | 1999-2002 | 2.52             | 671   | 26,594,868 | -0.43                       |
| 1-9               | Latino | 2012-2015 | 2.10             | 777   | 37,052,666 |                             |
| 1-9               | White  | 1999-2002 | 2.66             | 2,292 | 86,303,322 | -0.44                       |
| 1-9               | White  | 2012-2015 | 2.22             | 1,713 | 77,057,441 |                             |
| 10-14             | Black  | 1999-2002 | 2.70             | 352   | 13,016,250 | -0.55                       |
| 10-14             | Black  | 2012-2015 | 2.16             | 267   | 12,386,871 |                             |
| 10-14             | Latino | 1999-2002 | 2.98             | 393   | 13,196,911 | -0.76                       |
| 10-14             | Latino | 2012-2015 | 2.22             | 426   | 19,227,901 |                             |
| 10-14             | White  | 1999-2002 | 2.34             | 1,233 | 52,662,302 | -0.21                       |
| 10-14             | White  | 2012-2015 | 2.13             | 971   | 45,644,006 |                             |
| 15-19             | Black  | 1999-2002 | 4.08             | 491   | 12,033,644 | -1.17                       |
| 15-19             | Black  | 2012-2015 | 2.91             | 379   | 13,019,587 |                             |
| 15-19             | Latino | 1999-2002 | 3.71             | 480   | 12,925,959 | -0.67                       |
| 15-19             | Latino | 2012-2015 | 3.04             | 562   | 18,478,195 |                             |
| 15-19             | White  | 1999-2002 | 3.51             | 1,830 | 52,136,864 | -0.71                       |
| 15-19             | White  | 2012-2015 | 2.80             | 1,338 | 47,787,191 |                             |
| 20-24             | Black  | 1999-2002 | 5.68             | 619   | 10,893,725 | -1.35                       |
| 20-24             | Black  | 2012-2015 | 4.34             | 617   | 14,229,432 |                             |
| 20-24             | Latino | 1999-2002 | 4.64             | 647   | 13,941,374 | -0.15                       |
| 20-24             | Latino | 2012-2015 | 4.50             | 843   | 18,754,204 |                             |
| 20-24             | White  | 1999-2002 | 5.12             | 2,472 | 48,278,386 | -1.32                       |
| 20-24             | White  | 2012-2015 | 3.81             | 1,964 | 51,613,582 |                             |

| Age, years           | Race   | Years     | Rate per 100,000 | Count | Population | Absolute Change per 100,000 |
|----------------------|--------|-----------|------------------|-------|------------|-----------------------------|
| <b>Heart Disease</b> |        |           |                  |       |            |                             |
| 1-9                  | Black  | 1999-2002 | 1.44             | 316   | 22,291,060 | -0.12                       |
| 1-9                  | Black  | 2012-2015 | 1.32             | 294   | 22,117,715 |                             |
| 1-9                  | Latino | 1999-2002 | 0.68             | 183   | 26,594,868 | -0.27                       |
| 1-9                  | Latino | 2012-2015 | 0.41             | 153   | 37,052,666 |                             |
| 1-9                  | White  | 1999-2002 | 0.71             | 613   | 86,303,322 | -0.19                       |
| 1-9                  | White  | 2012-2015 | 0.52             | 403   | 77,057,441 |                             |
| 10-14                | Black  | 1999-2002 | 1.38             | 180   | 13,016,250 | -0.40                       |
| 10-14                | Black  | 2012-2015 | 0.99             | 122   | 12,386,871 |                             |
| 10-14                | Latino | 1999-2002 | 0.59             | 78    | 13,196,911 | -0.17                       |
| 10-14                | Latino | 2012-2015 | 0.42             | 81    | 19,227,901 |                             |
| 10-14                | White  | 1999-2002 | 0.70             | 370   | 52,662,302 | -0.23                       |
| 10-14                | White  | 2012-2015 | 0.48             | 217   | 45,644,006 |                             |
| 15-19                | Black  | 1999-2002 | 3.83             | 461   | 12,033,644 | -1.14                       |
| 15-19                | Black  | 2012-2015 | 2.69             | 350   | 13,019,587 |                             |
| 15-19                | Latino | 1999-2002 | 1.43             | 185   | 12,925,959 | -0.33                       |
| 15-19                | Latino | 2012-2015 | 1.10             | 204   | 18,478,195 |                             |
| 15-19                | White  | 1999-2002 | 1.75             | 911   | 52,136,864 | -0.51                       |
| 15-19                | White  | 2012-2015 | 1.24             | 591   | 47,787,191 |                             |
| 20-24                | Black  | 1999-2002 | 7.59             | 827   | 10,893,725 | -1.96                       |
| 20-24                | Black  | 2012-2015 | 5.63             | 801   | 14,229,432 |                             |
| 20-24                | Latino | 1999-2002 | 2.12             | 296   | 13,941,374 | -0.37                       |
| 20-24                | Latino | 2012-2015 | 1.75             | 328   | 18,754,204 |                             |
| 20-24                | White  | 1999-2002 | 2.64             | 1,274 | 48,278,386 | 0.00                        |
| 20-24                | White  | 2012-2015 | 2.64             | 1,362 | 51,613,582 |                             |
| <b>Suicide</b>       |        |           |                  |       |            |                             |
| 10-14                | Black  | 1999-2002 | 1.08             | 140   | 13,016,250 | 0.45                        |
| 10-14                | Black  | 2012-2015 | 1.53             | 189   | 12,386,871 |                             |
| 10-14                | Latino | 1999-2002 | 0.98             | 129   | 13,196,911 | 0.21                        |
| 10-14                | Latino | 2012-2015 | 1.19             | 228   | 19,227,901 |                             |
| 10-14                | White  | 1999-2002 | 1.42             | 747   | 52,662,302 | 0.80                        |
| 10-14                | White  | 2012-2015 | 2.22             | 1,014 | 45,644,006 |                             |
| 15-19                | Black  | 1999-2002 | 5.00             | 602   | 12,033,644 | 0.10                        |
| 15-19                | Black  | 2012-2015 | 5.10             | 664   | 13,019,587 |                             |
| 15-19                | Latino | 1999-2002 | 5.42             | 700   | 12,925,959 | 0.39                        |
| 15-19                | Latino | 2012-2015 | 5.81             | 1,073 | 18,478,195 |                             |
| 15-19                | White  | 1999-2002 | 8.99             | 4,685 | 52,136,864 | 1.86                        |
| 15-19                | White  | 2012-2015 | 10.84            | 5,182 | 47,787,191 |                             |

| Age, years                               | Race   | Years     | Rate per 100,000 | Count | Population | Absolute Change per 100,000 |
|------------------------------------------|--------|-----------|------------------|-------|------------|-----------------------------|
| <b>Suicide</b>                           |        |           |                  |       |            |                             |
| 20-24                                    | Black  | 1999-2002 | 10.55            | 1,149 | 10,893,725 | -0.36                       |
| 20-24                                    | Black  | 2012-2015 | 10.19            | 1,450 | 14,229,432 |                             |
| 20-24                                    | Latino | 1999-2002 | 7.22             | 1,007 | 13,941,374 | 2.18                        |
| 20-24                                    | Latino | 2012-2015 | 9.40             | 1,763 | 18,754,204 |                             |
| 20-24                                    | White  | 1999-2002 | 14.27            | 6,890 | 48,278,386 | 2.63                        |
| 20-24                                    | White  | 2012-2015 | 16.90            | 8,725 | 51,613,582 |                             |
| <b>Congenital Malformations</b>          |        |           |                  |       |            |                             |
| 1-9                                      | Black  | 1999-2002 | 3.03             | 663   | 22,291,060 | -0.59                       |
| 1-9                                      | Black  | 2012-2015 | 2.43             | 543   | 22,117,715 |                             |
| 1-9                                      | Latino | 1999-2002 | 2.05             | 558   | 26,594,868 | -0.40                       |
| 1-9                                      | Latino | 2012-2015 | 1.65             | 621   | 37,052,666 |                             |
| 1-9                                      | White  | 1999-2002 | 1.80             | 1,546 | 86,303,322 | -0.25                       |
| 1-9                                      | White  | 2012-2015 | 1.56             | 1,201 | 77,057,441 |                             |
| 10-14                                    | Black  | 1999-2002 | 1.42             | 185   | 13,016,250 | -0.36                       |
| 10-14                                    | Black  | 2012-2015 | 1.07             | 132   | 12,386,871 |                             |
| 10-14                                    | Latino | 1999-2002 | 0.80             | 105   | 13,196,911 | -0.05                       |
| 10-14                                    | Latino | 2012-2015 | 0.75             | 144   | 19,227,901 |                             |
| 10-14                                    | White  | 1999-2002 | 0.97             | 509   | 52,662,302 | -0.25                       |
| 10-14                                    | White  | 2012-2015 | 0.71             | 326   | 45,644,006 |                             |
| <b>Chronic Lower Respiratory Disease</b> |        |           |                  |       |            |                             |
| 10-14                                    | Black  | 1999-2002 | 1.35             | 176   | 13,016,250 | -0.02                       |
| 10-14                                    | Black  | 2012-2015 | 1.33             | 165   | 12,386,871 |                             |

**eTable 8.** Absolute Change for Specific Causes of Unintentional Injury Deaths in 20-24-year-olds between 1999-2002 and 2012-2015

| Race/ethnicity                       | Years     | Rate per 100,000 | Count  | Population | Absolute Rate per 100,000 |
|--------------------------------------|-----------|------------------|--------|------------|---------------------------|
| <b>Motor Vehicle Injury Deaths</b>   |           |                  |        |            |                           |
| Black                                | 1999-2002 | 25.60            | 2,789  | 10,893,725 | -8.55                     |
| Black                                | 2012-2015 | 17.05            | 2,426  | 14,229,432 |                           |
| Latino                               | 1999-2002 | 26.36            | 3,675  | 13,941,374 | -7.80                     |
| Latino                               | 2012-2015 | 18.56            | 3,480  | 18,754,204 |                           |
| White                                | 1999-2002 | 28.39            | 13,708 | 48,278,386 | -8.89                     |
| White                                | 2012-2015 | 19.50            | 10,065 | 51,613,582 |                           |
| <b>Other Transport Injury Deaths</b> |           |                  |        |            |                           |
| Black                                | 1999-2002 | 0.56             | 61     | 10,893,725 | -0.07                     |
| Black                                | 2012-2015 | 0.49             | 70     | 14,229,432 |                           |
| Latino                               | 1999-2002 | 1.02             | 142    | 13,941,374 | -0.56                     |
| Latino                               | 2012-2015 | 0.46             | 87     | 18,754,204 |                           |
| White                                | 1999-2002 | 1.26             | 610    | 48,278,386 | -0.56                     |
| White                                | 2012-2015 | 0.70             | 363    | 51,613,582 |                           |
| <b>Non-Transport Injury Deaths</b>   |           |                  |        |            |                           |
| Black                                | 1999-2002 | 5.75             | 626    | 10,893,725 | -1.34                     |
| Black                                | 2012-2015 | 4.41             | 627    | 14,229,432 |                           |
| Latino                               | 1999-2002 | 6.00             | 837    | 13,941,374 | -2.75                     |
| Latino                               | 2012-2015 | 3.25             | 610    | 18,754,204 |                           |
| White                                | 1999-2002 | 5.62             | 2,714  | 48,278,386 | -1.52                     |
| White                                | 2012-2015 | 4.10             | 2,116  | 51,613,582 |                           |
| <b>Unintentional Drug Poisoning</b>  |           |                  |        |            |                           |
| Black                                | 1999-2002 | 2.28             | 248    | 10,893,725 | 1.76                      |
| Black                                | 2012-2015 | 4.04             | 575    | 14,229,432 |                           |
| Latino                               | 1999-2002 | 2.70             | 377    | 13,941,374 | 3.18                      |
| Latino                               | 2012-2015 | 5.88             | 1,103  | 18,754,204 |                           |
| White                                | 1999-2002 | 5.63             | 2,718  | 48,278,386 | 11.70                     |
| White                                | 2012-2015 | 17.33            | 8,946  | 51,613,582 |                           |

**eTable 9.** Absolute Change for Means of Suicide between 1999-2002 and 2012-2015

| Age, years                        | Race   | Years     | Rate per 100,000 | Count | Population | Absolute Rate per 100,000 |
|-----------------------------------|--------|-----------|------------------|-------|------------|---------------------------|
| <b>Intentional Drug Poisoning</b> |        |           |                  |       |            |                           |
| 15-19                             | Black  | 1999-2002 | 0.14             | 17    | 12,033,644 | 0.10                      |
| 15-19                             | Black  | 2012-2015 | 0.24             | 31    | 13,019,587 |                           |
| 15-19                             | Latino | 1999-2002 | 0.17             | 22    | 12,925,959 | 0.11                      |
| 15-19                             | Latino | 2012-2015 | 0.28             | 52    | 18,478,195 |                           |
| 15-19                             | White  | 1999-2002 | 0.48             | 251   | 52,136,864 | 0.06                      |
| 15-19                             | White  | 2012-2015 | 0.54             | 259   | 47,787,191 |                           |
| 20-24                             | Black  | 1999-2002 | 0.29             | 32    | 10,893,725 | 0.27                      |
| 20-24                             | Black  | 2012-2015 | 0.56             | 80    | 14,229,432 |                           |
| 20-24                             | Latino | 1999-2002 | 0.23             | 32    | 13,941,374 | 0.27                      |
| 20-24                             | Latino | 2012-2015 | 0.50             | 94    | 18,754,204 |                           |
| 20-24                             | White  | 1999-2002 | 0.93             | 449   | 48,278,386 | 0.12                      |
| 20-24                             | White  | 2012-2015 | 1.05             | 544   | 51,613,582 |                           |
| <b>Firearms</b>                   |        |           |                  |       |            |                           |
| 15-19                             | Black  | 1999-2002 | 3.32             | 400   | 12,033,644 | -1.36                     |
| 15-19                             | Black  | 2012-2015 | 1.97             | 256   | 13,019,587 |                           |
| 15-19                             | Latino | 1999-2002 | 2.61             | 337   | 12,925,959 | -0.95                     |
| 15-19                             | Latino | 2012-2015 | 1.66             | 307   | 18,478,195 |                           |
| 15-19                             | White  | 1999-2002 | 4.92             | 2,567 | 52,136,864 | 0.14                      |
| 15-19                             | White  | 2012-2015 | 5.06             | 2,418 | 47,787,191 |                           |
| 20-24                             | Black  | 1999-2002 | 7.07             | 770   | 10,893,725 | -2.13                     |
| 20-24                             | Black  | 2012-2015 | 4.94             | 703   | 14,229,432 |                           |
| 20-24                             | Latino | 1999-2002 | 3.75             | 523   | 13,941,374 | -0.19                     |
| 20-24                             | Latino | 2012-2015 | 3.56             | 668   | 18,754,204 |                           |
| 20-24                             | White  | 1999-2002 | 7.99             | 3,858 | 48,278,386 | 0.51                      |
| 20-24                             | White  | 2012-2015 | 8.50             | 4,389 | 51,613,582 |                           |
| <b>Hanging</b>                    |        |           |                  |       |            |                           |
| 15-19                             | Black  | 1999-2002 | 1.16             | 139   | 12,033,644 | 1.19                      |
| 15-19                             | Black  | 2012-2015 | 2.34             | 305   | 13,019,587 |                           |
| 15-19                             | Latino | 1999-2002 | 2.24             | 289   | 12,925,959 | 1.00                      |
| 15-19                             | Latino | 2012-2015 | 3.23             | 597   | 18,478,195 |                           |
| 15-19                             | White  | 1999-2002 | 2.79             | 1,452 | 52,136,864 | 1.48                      |
| 15-19                             | White  | 2012-2015 | 4.27             | 2,038 | 47,787,191 |                           |
| 20-24                             | Black  | 1999-2002 | 2.02             | 220   | 10,893,725 | 1.31                      |
| 20-24                             | Black  | 2012-2015 | 3.33             | 474   | 14,229,432 |                           |
| 20-24                             | Latino | 1999-2002 | 2.53             | 352   | 13,941,374 | 1.63                      |
| 20-24                             | Latino | 2012-2015 | 4.16             | 780   | 18,754,204 |                           |
| 20-24                             | White  | 1999-2002 | 3.78             | 1,827 | 48,278,386 | 1.95                      |
| 20-24                             | White  | 2012-2015 | 5.73             | 2,957 | 51,613,582 |                           |

| Age, years   | Race   | Years     | Rate per 100,000 | Count | Population | Absolute Rate per 100,000 |
|--------------|--------|-----------|------------------|-------|------------|---------------------------|
| <b>Other</b> |        |           |                  |       |            |                           |
| 15-19        | Black  | 1999-2002 | 0.37             | 45    | 12,033,644 | 0.16                      |
| 15-19        | Black  | 2012-2015 | 0.53             | 69    | 13,019,587 |                           |
| 15-19        | Latino | 1999-2002 | 0.40             | 51    | 12,925,959 | 0.22                      |
| 15-19        | Latino | 2012-2015 | 0.61             | 113   | 18,478,195 |                           |
| 15-19        | White  | 1999-2002 | 0.76             | 398   | 52,136,864 | 0.18                      |
| 15-19        | White  | 2012-2015 | 0.94             | 451   | 47,787,191 |                           |
| 20-24        | Black  | 1999-2002 | 1.15             | 125   | 10,893,725 | 0.19                      |
| 20-24        | Black  | 2012-2015 | 1.34             | 190   | 14,229,432 |                           |
| 20-24        | Latino | 1999-2002 | 0.69             | 96    | 13,941,374 | 0.46                      |
| 20-24        | Latino | 2012-2015 | 1.15             | 215   | 18,754,204 |                           |
| 20-24        | White  | 1999-2002 | 1.54             | 744   | 48,278,386 | 0.02                      |
| 20-24        | White  | 2012-2015 | 1.56             | 803   | 51,613,582 |                           |

**eFigure 1.** Non-Leading Causes of Death for White, Black and Latino Infants

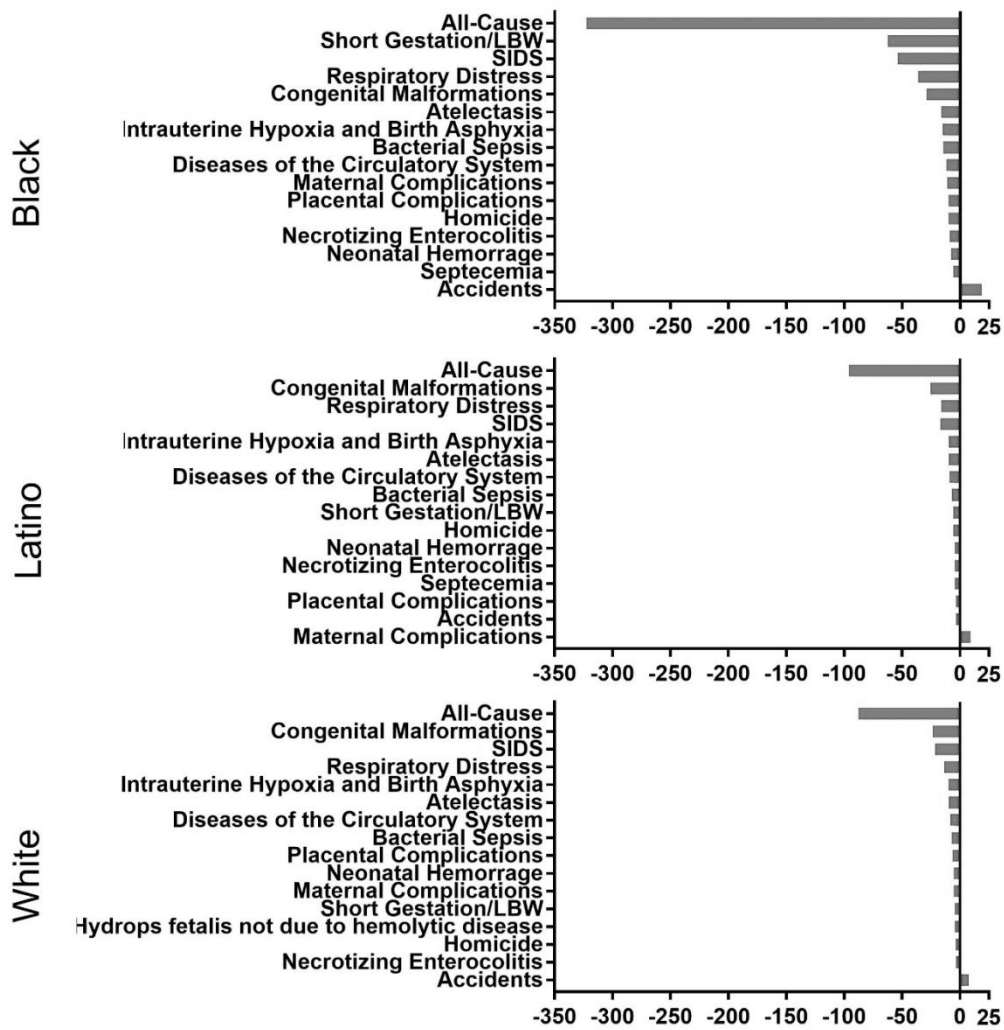



**eFigure 2.** Absolute rate change between 1999-2002 and 2012-2015 for leading causes of death for White, Black and Latino A) 1-9-year-olds and B) 10-14-year-olds, and C) 15-19-year-olds. All rates are expressed per 100,000

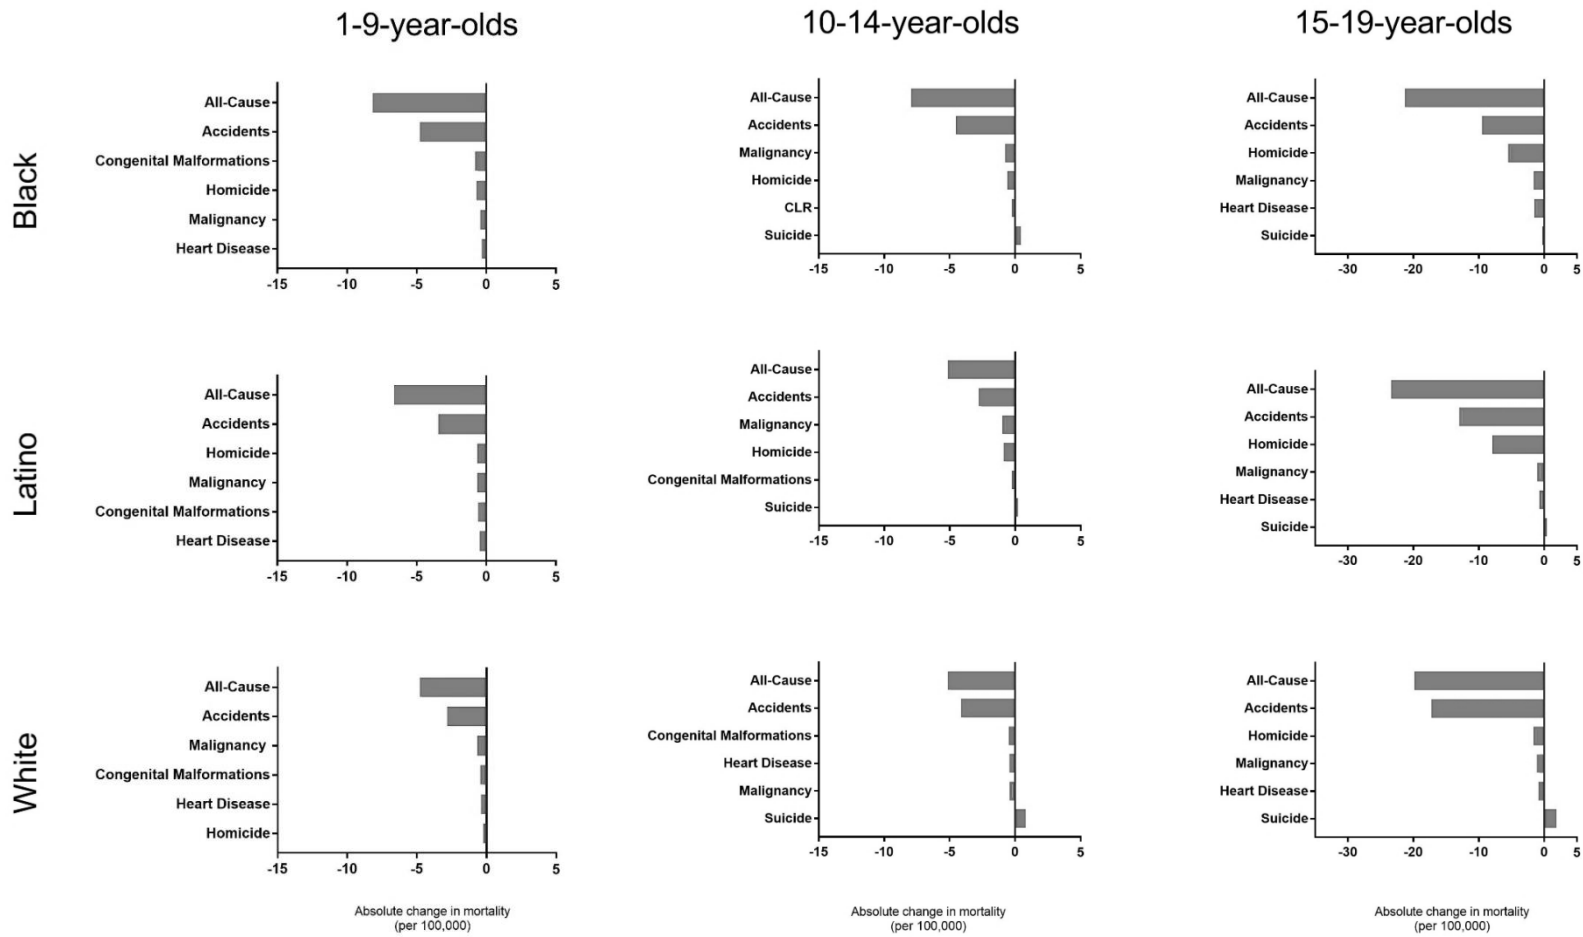

Supplement: jamapediatr-172-e183317-s001.pdf [file jamapediatr-172-e183317-s001.pdf]
