# Supplementary material
Source: PubMed Central journal article supplement (PMC6583035)
Supplement: jamapediatr-172-e183317-s002.pdf [file jamapediatr-172-e183317-s002.pdf]

## Data Sharing Statement

Khan. Infant and youth mortality trends by race/ethnicity and cause of death in the United States. *JAMA Pediatr*. Published online October 1, 2018.  
doi:10.1001/jamapediatrics.2018.3317

### Data

**Data available:** No

This supplementary material has been provided by the authors to give readers additional information about their work.

### Additional Information

**Explanation for why data not available:** Data are publicly available from CDC Wonder.
